# Supplementary material for: HPV-Mediated Resistance to TNF and TRAIL Is Characterized by Global Alterations in Apoptosis Regulatory Factors, Dysregulation of Death Receptors, and Induction of ROS/RNS
Source: MDPI journal article supplement (doi:10.3390/ijms20010198), 2019-01-08
Supplement: s1 [file s1]

## Cabeça et al. Figure S1

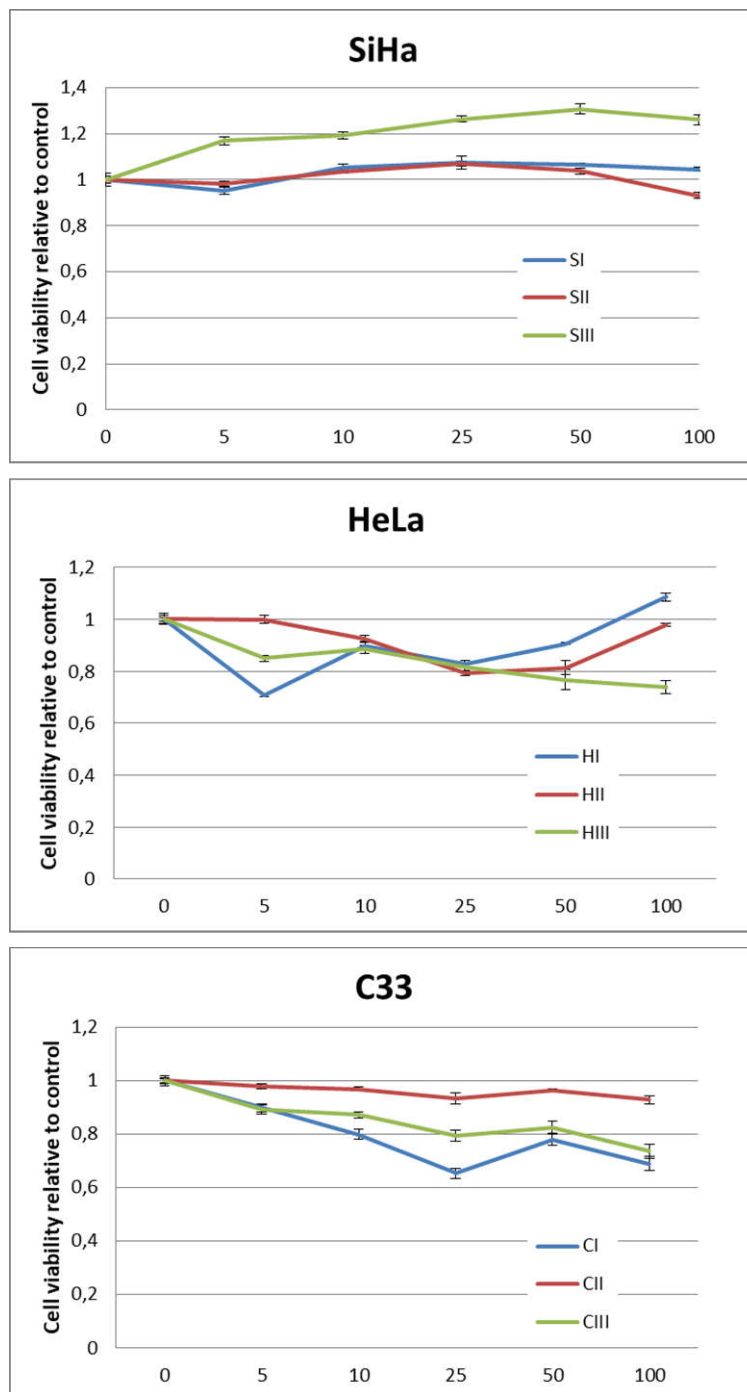

**Figure S1 – Cervical cancer derived cell lines are resistant to TRAIL.** Effect of TRAIL on cervical cancer derived cell lines SiHa, HeLa and C33. Cells were cultured in 96 wells plates (2000 cells/well) and after 24 hours they were treated with 5, 10, 25, 50 or 100 ng/mL of TRAIL. All treatments were performed in octuplicate. After 60 hours 10  $\mu$ L of Alamar blue were added per well and cells were incubated at 37° C in an incubator for at least 4 hours. After this period, Alamar Blue's reduction was monitored in a spectrophotometer through absorbance measurement at 570 e 600 nm. The results presented are from three independent experiments (I-III). All data are presented as values relative to control.

## Cabeça et al. Figure S2

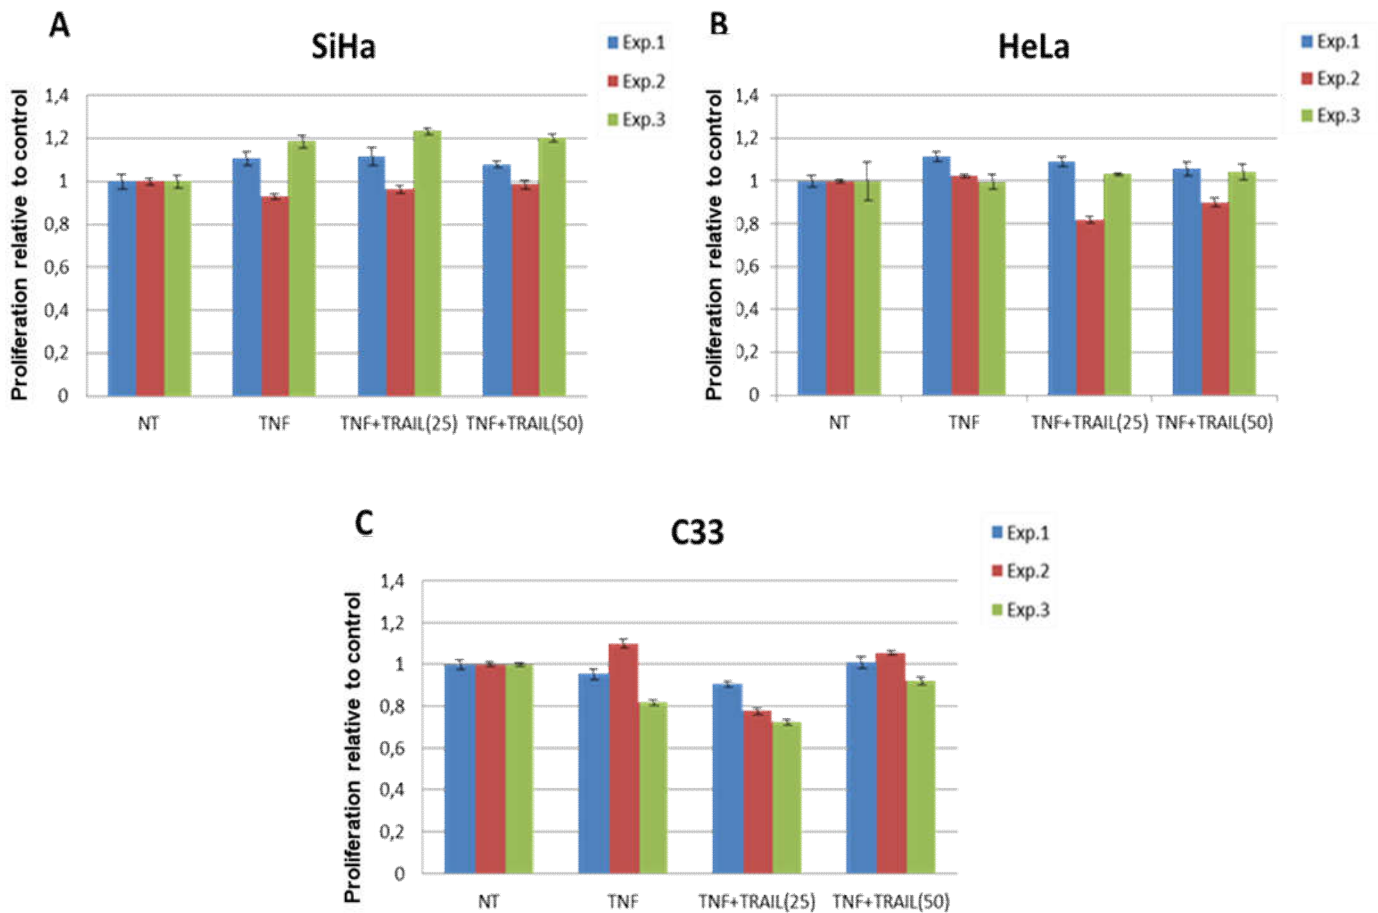

**Figure S2 – Cervical cancer derived cell lines are resistant to the combined action of pro-inflammatory cytokines TNF and TRAIL.** Cells were cultured in 96 wells plates (2000 cells/well) and after 24 hours they were treated with 2 nM TNF or with 2 nM TNF plus 25 or 50 ng/mL of TRAIL. All treatments were performed in octuplicate. After 60 hours 10  $\mu$ L of Alamar blue were added per well and cells were incubated at 37° C in an incubator for at least 4 hours. After this period, Alamar Blue's reduction was monitored in a spectrophotometer through absorbance measurement at 570 e 600 nm. The results presented are from three independent experiments. All data are presented as values relative to control.

## Cabeça et al. Figure S3

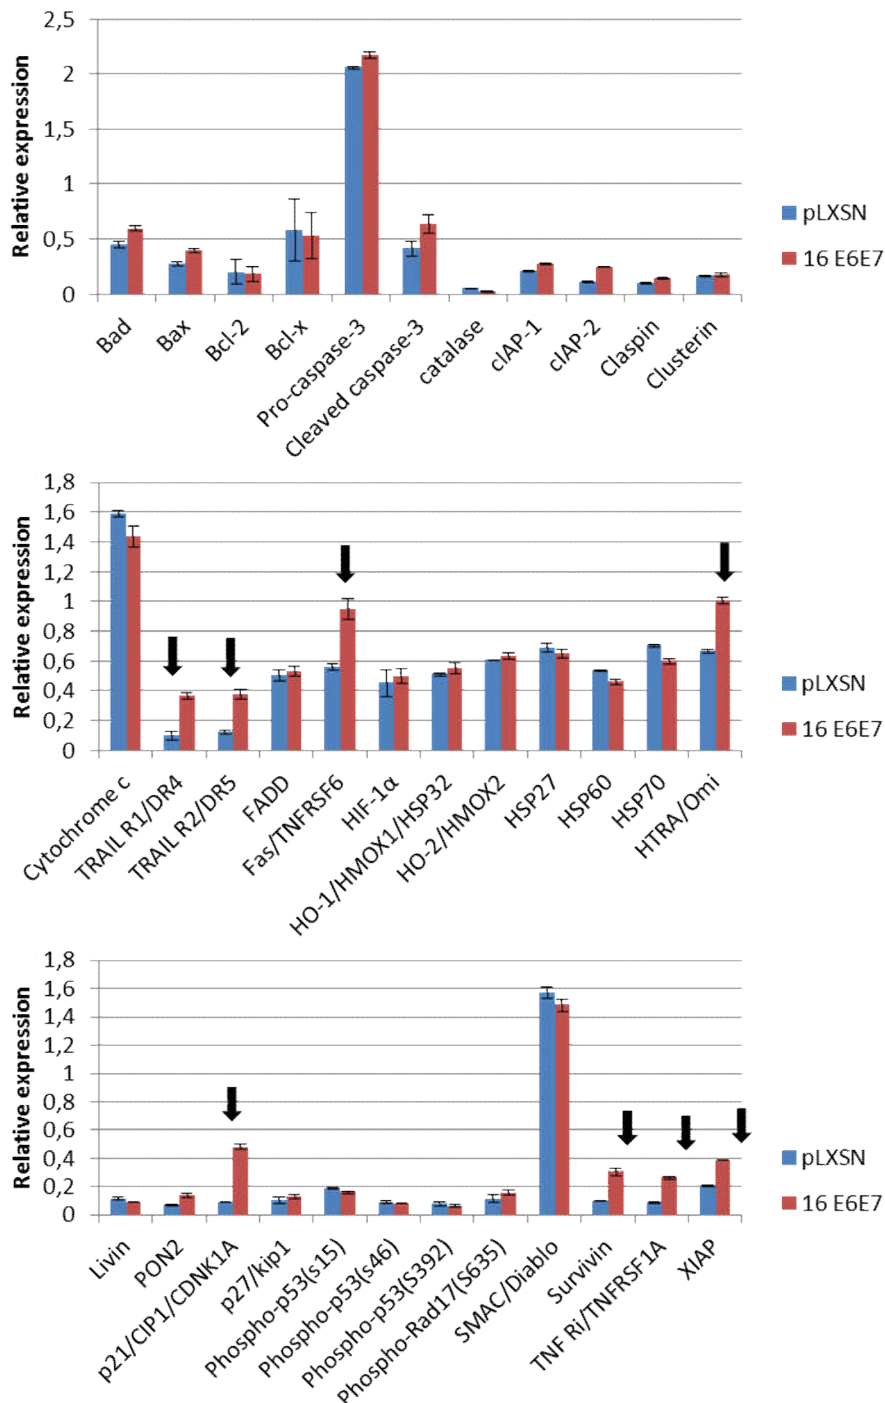

**Figure 3 – Effect of HPV16 E6 and E7 in the levels of proteins associated with apoptosis regulation/execution upon treatment with TNF.** The expression of 35 proteins involved in the regulation/execution of apoptosis was determined in total protein extracts of epithelial organotypic cultures established from control (pLXSN) and HPV16 E6/E7 transduced PHKs before and after treatment with 2 nM of TNF. For this purpose we used the Proteome Profiler™ Array - Human Apoptosis Array Kit (R&D Systems, #ARY009), according to the manufacturer's instructions. Signals obtained were quantified using ImageJ software and presented as expression relative to endogenous controls. The results presented are representative of three independent experiments.

## Cabeça et al. Figure S4

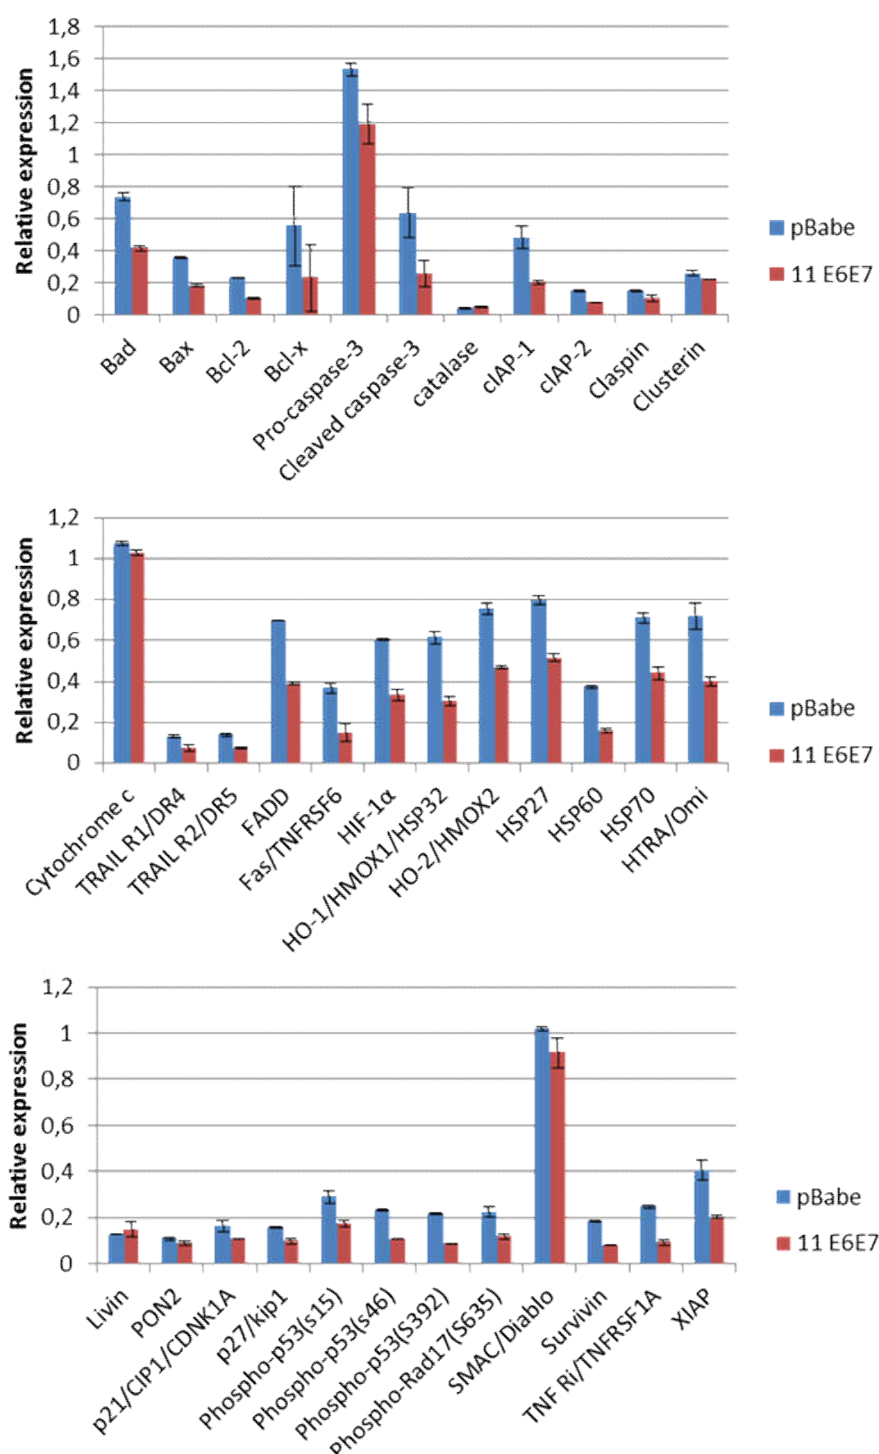

**Figure S4 – Effect of HPV11 E6 and E7 in the levels of proteins associated with apoptosis regulation/execution upon treatment with TRAIL.** The expression of 35 proteins involved in the regulation/execution of apoptosis was determined in total protein extracts of epithelial organotypic cultures established from control (pBABE) and HPV11 E6/E7 transduced PHKs before and after treatment with 50 ng/mL of TRAIL. For this purpose we used the Proteome Profiler™ Array - Human Apoptosis Array Kit (R&D Systems, #ARY009), according to the manufacturer's instructions. Signals obtained were quantified using ImageJ software and presented as expression relative to endogenous controls. The results presented are representative of three independent experiments.
